# Supplementary material for: Integration of clinical characteristics, lab tests and a deep learning CT scan analysis to predict severity of hospitalized COVID-19 patients
Source: bioRxiv or medRxiv preprint supplement (doi:10.1101/2020.05.14.20101972), 2020-10-06
Supplement: Supplementary file [file 2020.05.14.20101972-1.pdf]

Supplementary material of “AI-based  
*multi-modal* integration of clinical  
characteristics, lab tests and chest  
CTs improves COVID-19 outcome  
prediction of *hospitalized* patients”

# Supplementary Figures and Tables

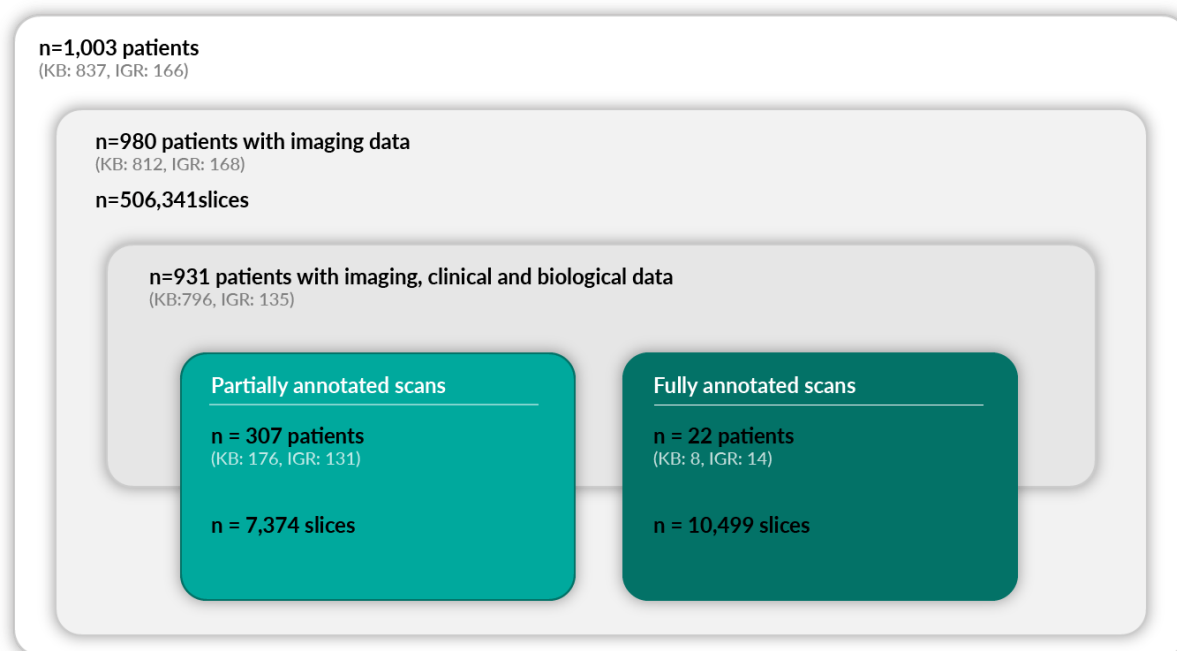

**Supp Fig. 1: Description of the retrospective cohort.** Number of patients and repartition per hospital for different all patients, patients

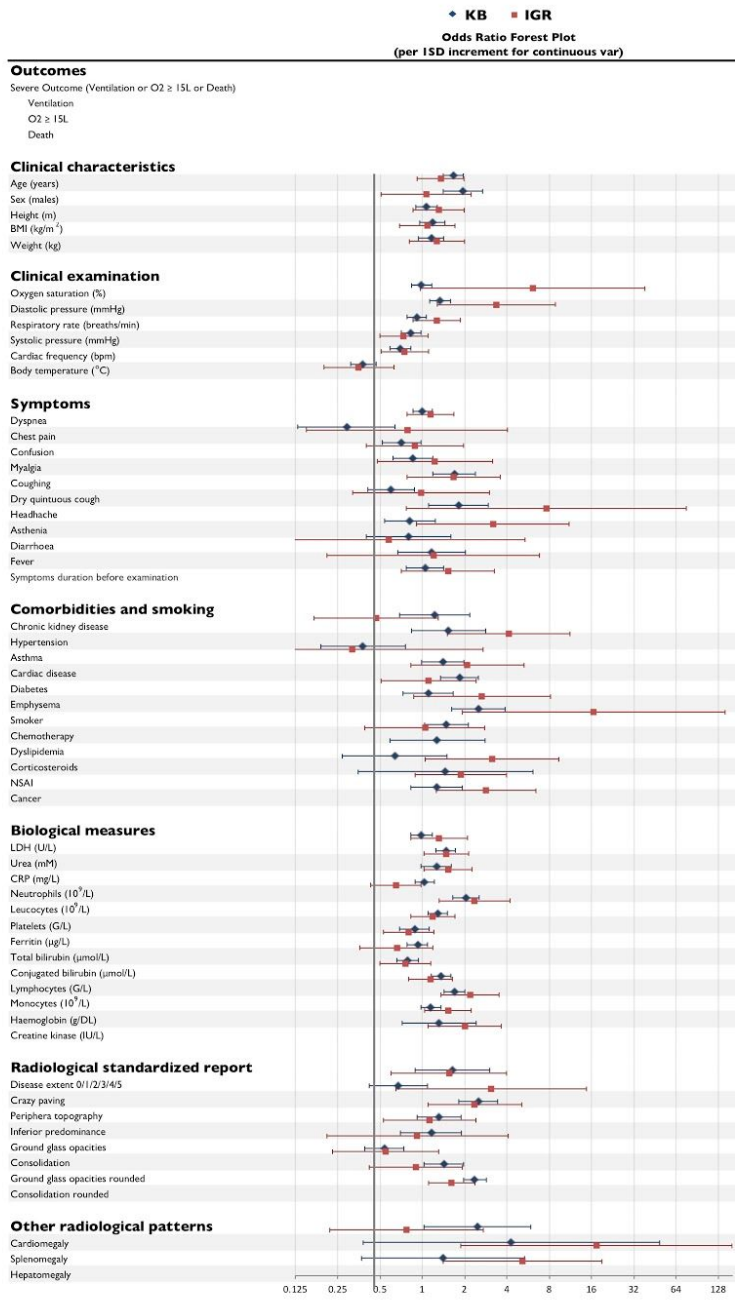

**Supp Fig. 2: Forest plot for the different variables measured at baseline.** For continuous variables, odds ratios are computed for an increase of one standard deviation of the continuous variable. KB odds ratios are in blue, IGR are in red.

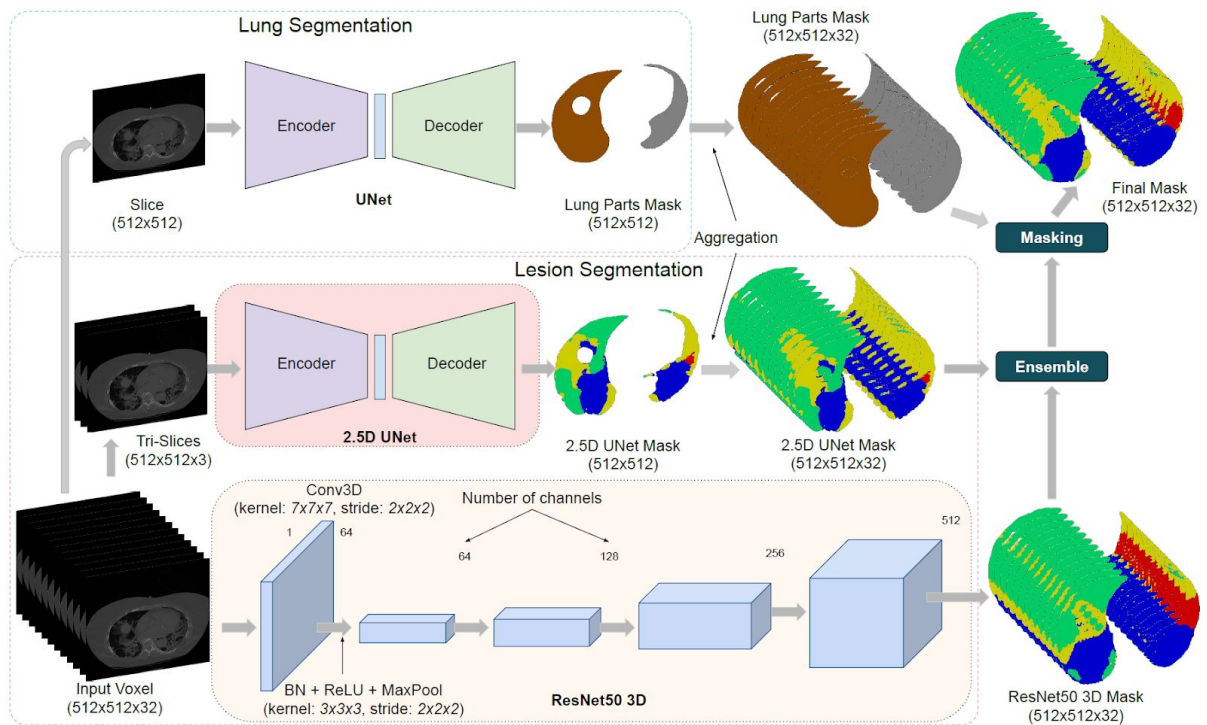

**Supp Fig. 3: AI-segment architecture** - Proposed pipeline to generate lesion volumetry estimates from patient CT scans employing ensemble of segmentation networks. Normalized patient scans are provided to our trained 2.5D U-Net and 3D ResNet50. The masks predicted from both models are then merged by arithmetic mean. In parallel, we segment left-right lungs from the patient scans using a dedicated U-Net. Finally, the left-right lung mask is used to mask-out lesions in left and right lungs from the ensemble output. This pipeline utilizes the complementary features learned by a weak model (2.5D U-Net) and a strong one (3D ResNet50).

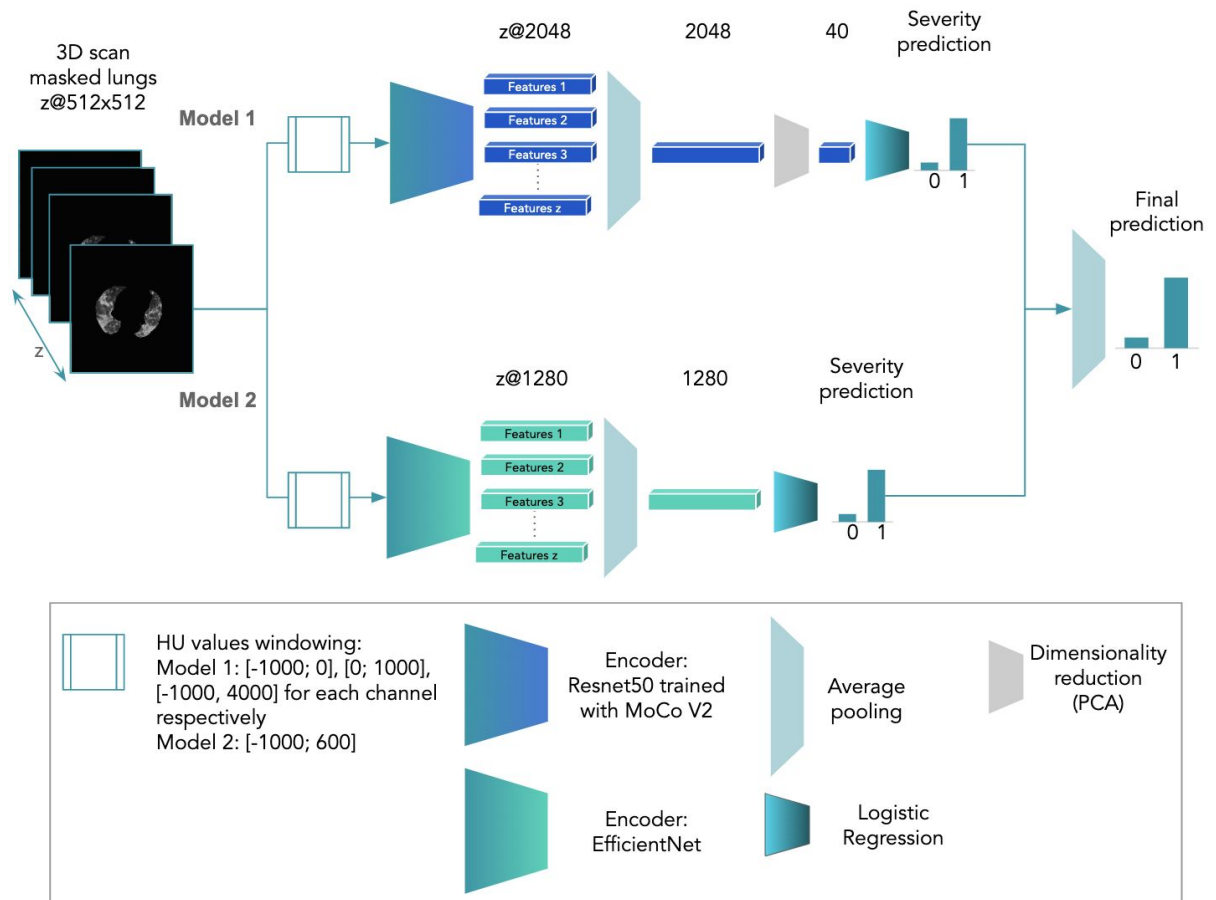

**Supp Fig. 4: AI-severity model to predict severity from 3D chest CT scans.** Two different pipelines were used: one using Resnet50 (trained with MocoV2 on 1 million public CT scan slices) as encoder (model 1) and one using EfficientNet B0 as encoder (model 2).

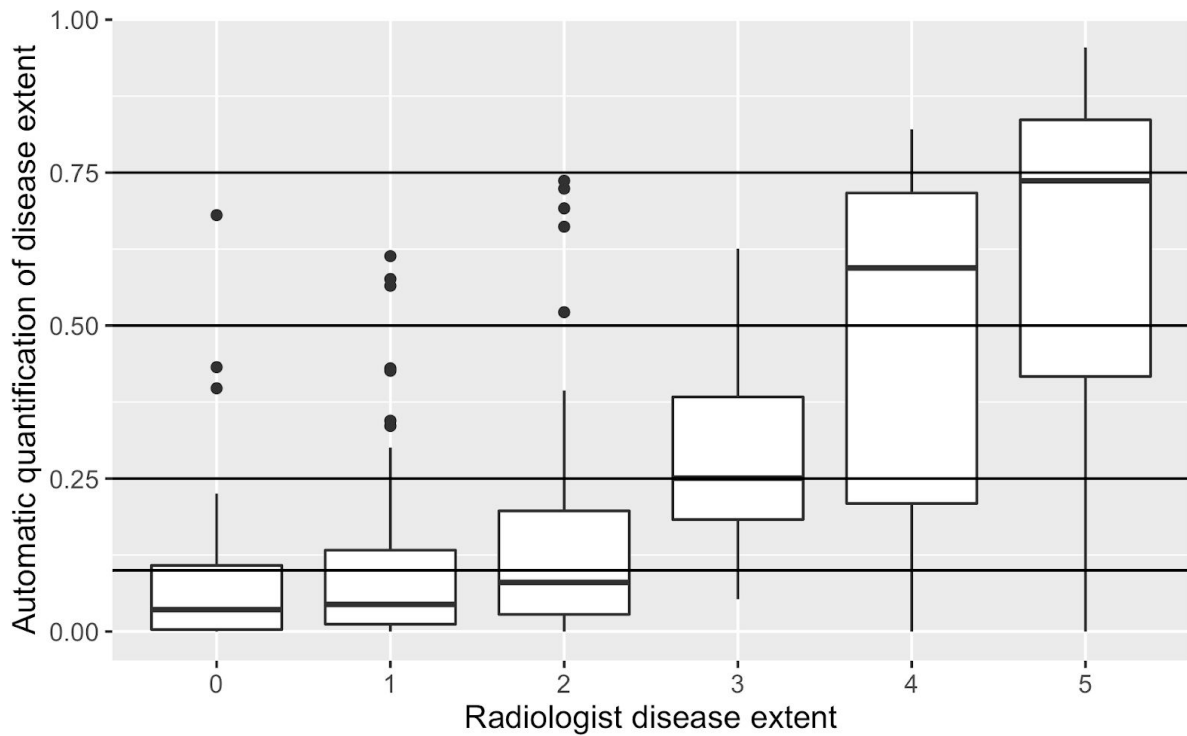

**Supp Fig. 5: Boxplot to compare automatic quantification of disease extent by *AI-segment* to disease extent as estimated by a radiologist.** The coding of disease extent in the radiologist report is as follows: 0 (0% of lesions), 1 (<10% of lesions), 2 (between 10 and 25% of lesions), 3 (between 25 and 50% of lesions), 4 (between 50 and 75% of lesions), 5 (more than 75% of lesions). The lower and upper hinges correspond to the first and third quartiles. The upper whisker extends from the hinge to the largest value no further than  $1.5 \times \text{IQR}$  from the hinge (where IQR is the inter-quartile range). The lower whisker extends from the hinge to the smallest value at most  $1.5 \times \text{IQR}$  of the hinge. Data beyond the end of the whiskers are called "outlying" points and are plotted individually.

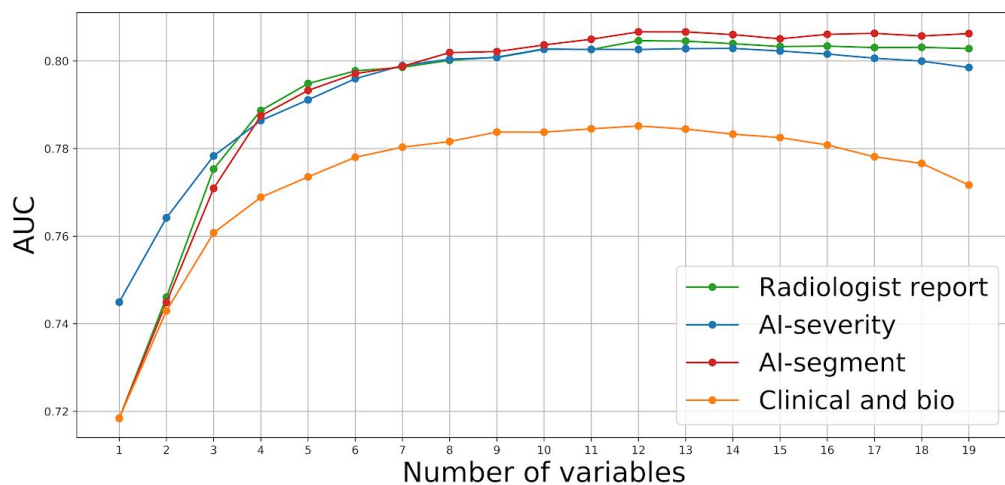

**Supp Fig. 6: AUC curve as a function of the number of clinical and biological information added to the multimodal model.** Variables included in the models consist of CT scan variables only and then a greedy algorithm adds clinical or biological variables iteratively. At each step of the algorithm, the variable that results in the largest increase of AUC score is added.

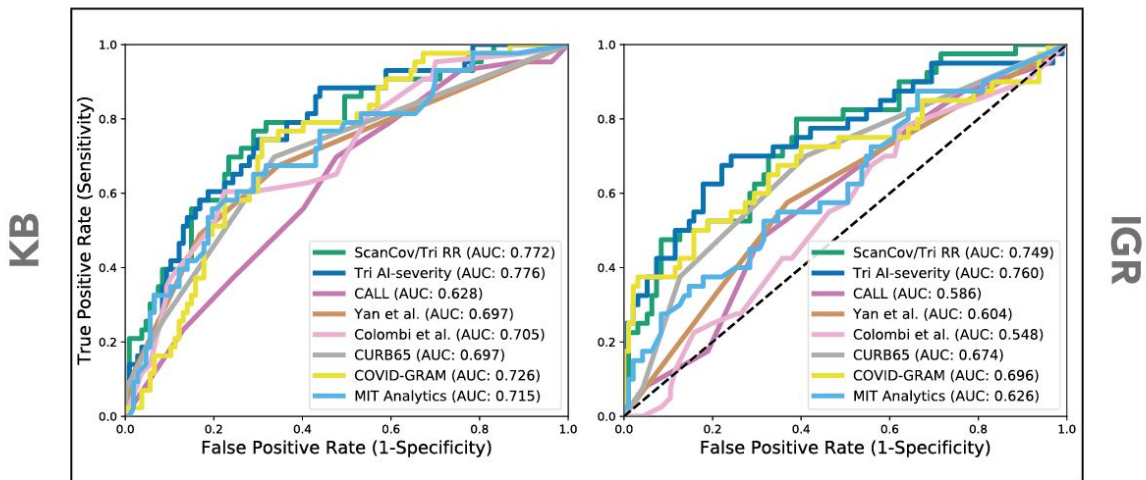

**Supp Fig. 7: Receiver operating characteristic (ROC) curves of the models that predict severity.** Models were evaluated on two distinct validation sets consisting of 150 patients from KB (left panels) and 137 patients from IGR (right panels). ROC curves were obtained using the severity outcome defined as an oxygen flow rate of 15 L/min or higher, the need for mechanical ventilation, or death.

|                       | <b>GGO</b> | <b>Crazy paving</b> | <b>Consolidation</b> |
|-----------------------|------------|---------------------|----------------------|
| Accuracy (1% thresh.) | 0.7951     | 0.7684              | 0.6167               |
| F1 Score (1% thresh.) | 0.8848     | 0.6452              | 0.7473               |
| Accuracy (2% thresh.) | 0.7876     | 0.7692              | 0.6667               |
| F1 Score (2% thresh.) | 0.8800     | 0.6182              | 0.7848               |

**Supp Table 1: Detection accuracy and F1 scores of *AI-segment* when considering the radiologist report as ground truth.** The binary decision used to compute the score is “presence or not of a lesion type”. Accuracy and F1 score are averaged over the IGR validation set. We compared, for each patient of the IGR validation set, detection obtained using *AI-segment* to the information provided in the standardized radiologist report. When using *AI-segment*, a lesion type is considered as present when its relative volume w.r.t. the full volume of both lung, is above a certain threshold indicated into parenthesis in the 1st column of the table.

| <b>Variable</b>   | <b>Center</b> | <b>Odds ratio</b><br>(95%lower - 95%<br>upper) | <b>P-value</b> | <b>P-value Stouffer</b> |
|-------------------|---------------|------------------------------------------------|----------------|-------------------------|
| GGO AI            | KB            | 0.64 (0.54,0.76)                               | 4.28e-07       | 1.94e-07                |
| GGO AI            | IGR           | 0.77 (0.54,1.10)                               | 0.15           |                         |
| Crazy Paving AI   | KB            | 1.47 (1.20,1.79)                               | 0.00015        | 6.70e-05                |
| Crazy Paving AI   | IGR           | 1.31 (0.92,1.87)                               | 0.13           |                         |
| Consolidation AI  | KB            | 1.46 (1.23,1.73)                               | 1.59e-05       | 7.61e-06                |
| Consolidation AI  | IGR           | 1.27 (0.89,1.82)                               | 0.19           |                         |
| Disease extent AI | KB            | 2.11 (1.74,2.55)                               | 2.97e-14       | 7.66e-16                |
| Disease extent AI | IGR           | 1.90 (1.30,2.79)                               | 0.00091        |                         |

**Supp Table 2: Association between severity and amount of lesions inferred by *AI-segment*.** For disease extent, we consider the proportion of the lung volume. For the other three variables (GGO, consolidation, crazy paving), we normalize them by disease extent so that each variable measures the proportion of the corresponding lesion.



| Model description                                    | KB                    | IGR                   | KB CV                 |
|------------------------------------------------------|-----------------------|-----------------------|-----------------------|
| <b>O<sub>2</sub>≥15L/min or Ventilation or Death</b> |                       |                       |                       |
| Radiologist report                                   | 0.713 (0.621 - 0.804) | 0.647 (0.545 - 0.749) | 0.702 (0.580 - 0.827) |
| AI-severity                                          | 0.756 (0.666 - 0.846) | 0.748 (0.657 - 0.839) | 0.745 (0.621 - 0.842) |
| AI-segment                                           | 0.666 (0.565 - 0.767) | 0.696 (0.596 - 0.795) | 0.712 (0.566 - 0.808) |
| Clinical and bio                                     | 0.736 (0.649 - 0.822) | 0.745 (0.648 - 0.842) | 0.784 (0.700 - 0.880) |
| ScanCov (Trimodal Radiologist report)                | 0.772 (0.688 - 0.855) | 0.749 (0.658 - 0.839) | 0.798 (0.720 - 0.903) |
| Trimodal AI-severity                                 | 0.776 (0.696 - 0.856) | 0.760 (0.665 - 0.856) | 0.803 (0.699 - 0.886) |
| Trimodal AI-segment                                  | 0.744 (0.658 - 0.830) | 0.764 (0.672 - 0.857) | 0.804 (0.708 - 0.894) |
| CALL                                                 | 0.628 (0.533 - 0.723) | 0.586 (0.483 - 0.689) |                       |
| Yan et al. (2020)                                    | 0.697 (0.607 - 0.788) | 0.604 (0.508 - 0.701) |                       |
| Colombi et al. (2020)                                | 0.705 (0.613 - 0.797) | 0.548 (0.444 - 0.653) |                       |
| CURB65                                               | 0.697 (0.604 - 0.789) | 0.674 (0.579 - 0.770) |                       |
| COVID-GRAM                                           | 0.726 (0.642 - 0.811) | 0.696 (0.587 - 0.804) |                       |
| MIT analytics                                        | 0.715 (0.623 - 0.807) | 0.626 (0.521 - 0.732) |                       |
| <b>Death</b>                                         |                       |                       |                       |
| Radiologist report                                   | 0.656 (0.548 - 0.764) | 0.652 (0.532 - 0.772) | 0.659 (0.499 - 0.815) |
| AI-severity                                          | 0.752 (0.660 - 0.845) | 0.753 (0.644 - 0.862) | 0.710 (0.630 - 0.835) |
| AI-segment                                           | 0.635 (0.517 - 0.753) | 0.662 (0.532 - 0.793) | 0.660 (0.532 - 0.796) |
| Clinical and bio                                     | 0.773 (0.685 - 0.861) | 0.888 (0.824 - 0.952) | 0.800 (0.690 - 0.915) |
| ScanCov (Trimodal Radiologist report)                | 0.814 (0.732 - 0.896) | 0.837 (0.755 - 0.920) | 0.792 (0.695 - 0.925) |
| Trimodal AI-severity                                 | 0.815 (0.742 - 0.889) | 0.890 (0.829 - 0.950) | 0.800 (0.718 - 0.906) |
| Trimodal AI-segment                                  | 0.778 (0.694 - 0.862) | 0.897 (0.837 - 0.957) | 0.797 (0.708 - 0.926) |
| CALL                                                 | 0.711 (0.606 - 0.815) | 0.648 (0.544 - 0.753) |                       |
| Yan et al. (2020)                                    | 0.646 (0.538 - 0.754) | 0.706 (0.598 - 0.815) |                       |
| Colombi et al. (2020)                                | 0.788 (0.700 - 0.876) | 0.585 (0.468 - 0.702) |                       |
| CURB65                                               | 0.812 (0.736 - 0.888) | 0.700 (0.592 - 0.808) |                       |
| COVID-GRAM                                           | 0.781 (0.691 - 0.872) | 0.789 (0.688 - 0.891) |                       |
| MIT analytics                                        | 0.853 (0.786 - 0.920) | 0.644 (0.532 - 0.756) |                       |
| <b>Death or ICU</b>                                  |                       |                       |                       |
| Radiologist report                                   | 0.713 (0.628 - 0.799) | 0.736 (0.639 - 0.833) | 0.720 (0.603 - 0.835) |
| AI-severity                                          | 0.767 (0.685 - 0.849) | 0.825 (0.748 - 0.902) | 0.749 (0.632 - 0.857) |
| AI-segment                                           | 0.676 (0.583 - 0.769) | 0.767 (0.675 - 0.858) | 0.724 (0.594 - 0.820) |
| Clinical and bio                                     | 0.768 (0.687 - 0.850) | 0.812 (0.732 - 0.892) | 0.781 (0.679 - 0.876) |
| ScanCov (Trimodal Radiologist report)                | 0.781 (0.703 - 0.860) | 0.830 (0.755 - 0.905) | 0.794 (0.716 - 0.892) |
| Trimodal AI-severity                                 | 0.806 (0.732 - 0.880) | 0.844 (0.771 - 0.917) | 0.805 (0.721 - 0.896) |
| Trimodal AI-segment                                  | 0.764 (0.684 - 0.844) | 0.848 (0.776 - 0.920) | 0.802 (0.728 - 0.902) |
| CALL                                                 | 0.584 (0.488 - 0.680) | 0.592 (0.488 - 0.695) |                       |
| Yan et al. (2020)                                    | 0.723 (0.641 - 0.806) | 0.670 (0.576 - 0.763) |                       |
| Colombi et al (2020)                                 | 0.682 (0.592 - 0.772) | 0.588 (0.486 - 0.689) |                       |
| CURB65                                               | 0.688 (0.598 - 0.778) | 0.709 (0.618 - 0.800) |                       |
| COVID-GRAM                                           | 0.718 (0.632 - 0.803) | 0.702 (0.600 - 0.805) |                       |
| MIT Analytics                                        | 0.712 (0.623 - 0.800) | 0.656 (0.558 - 0.753) |                       |

**Supp Table 3: AUC values for the different models on the different sets.** Each model was trained on 646 patients from KB. Results are reported on the validation set from KB (150 patients) and the external validation set from IGR (135 patients), as well as on the training set using 5 fold cross validation stratified by outcome and age (CV KB).

| Variable               | AUC on KB validation set | AUC on IGR validation set |
|------------------------|--------------------------|---------------------------|
| Age > 60               | 0.884 (0.828 - 0.940)    | 0.786 (0.710 - 0.862)     |
| Sex                    | 0.933 (0.892 - 0.975)    | 0.893 (0.838 - 0.947)     |
| Oxygen saturation > 90 | 0.761 (0.681 - 0.840)    | 0.782 (0.676 - 0.888)     |
| Disease extent > 2     | 0.926 (0.887 - 0.965)    | 0.881 (0.819 - 0.943)     |
| Crazy paving           | 0.775 (0.700 - 0.851)    | 0.725 (0.637 - 0.812)     |
| Condensation           | 0.6365 (0.534 - 0.737)   | 0.675 (0.583 - 0.767)     |
| GGO                    | 0.800 (0.655 - 0.944)    | 0.583 (0.475 - 0.690)     |

**Supp Table 4: AI-severity model performances on other classification tasks than severity prediction.** AUC scores are reported on both KB and IGR validation sets when re-training the AI-severity model to predict a few clinical and radiological variables we have selected. We considered the feature vector of AI-severity obtained when

| Models                   | Variables included |                   |      |     |          |                        |         |                    |                 |            |
|--------------------------|--------------------|-------------------|------|-----|----------|------------------------|---------|--------------------|-----------------|------------|
| ScanCovIA                | Oxygen saturation  | Disease extent    | Age  | Sex | Platelet | Urea                   |         |                    |                 |            |
| Tri AI-severity          | AI-severity        | Oxygen saturation | Urea | Sex | Platelet | Age                    | LDH     | Diastolic pressure | Hypertension    | Neutrophil |
| Tri AI-segment           | Oxygen saturation  | Consolidation AI  | Age  | Sex | Platelet | GGO AI                 | Urea    | LDH                | Crazy paving AI | Dyspnea    |
| Clinical and bio (C & B) | Oxygen saturation  | Age               | Sex  | LDH | Platelet | Chronic kidney disease | Dyspnea | Hypertension       | Neutrophil      | Urea       |

**Supp Table 5: Names of the variables included in the 4 different models.**

| Variable          | Coding/unit               | Transformation       | Coefficient |
|-------------------|---------------------------|----------------------|-------------|
| Oxygen saturation | %                         | $-\log(1 + 100 - X)$ | -0.745      |
| Disease extent    | 0 to 5 scale              | None                 | 0.611       |
| Age               |                           | None                 | 0.025       |
| Sex               | 1 for male<br>0 for woman | None                 | 0.545       |
| Platelet          | G/L                       | $\log(0.001 + X)$    | -0.838      |
| Urea              | mmol/L                    | $\log(0.001 + X)$    | 0.608       |

**Supp Table 6: Coefficients, transformation, and units to compute the ScanCov score.** Disease extent values can be: 0 (no extent of disease) / 1 (<10%) / 2 (10-24%) / 3 (25-49%) / 4 (50-74%) / 5 >75%.

| Variable                             | Correlation | Lower C.I. | Upper C.I |
|--------------------------------------|-------------|------------|-----------|
| LDH                                  | 0.52        | 0.45       | 0.58      |
| CRP                                  | 0.45        | 0.39       | 0.51      |
| Oxygen saturation                    | -0.43       | -0.49      | -0.37     |
| Ferritin                             | 0.3         | 0.18       | 0.4       |
| Monocyte                             | -0.23       | -0.29      | -0.15     |
| Respiratory rate                     | 0.18        | 0.1        | 0.25      |
| Weight                               | 0.16        | 0.07       | 0.24      |
| Neutrophil                           | 0.15        | 0.08       | 0.22      |
| Symptoms duration before examination | 0.12        | 0.05       | 0.19      |
| BMI                                  | 0.12        | 0.02       | 0.22      |
| Height                               | 0.12        | 0.02       | 0.21      |
| Total bilirubin                      | 0.1         | 0.02       | 0.17      |
| Leucocytes                           | 0.09        | 0.02       | 0.17      |
| Lymphocyte                           | -0.09       | -0.16      | -0.01     |
| Cardiac frequency                    | 0.08        | 0.01       | 0.15      |
| Urea                                 | 0.07        | -0.01      | 0.14      |
| Conjugated bilirubin                 | 0.07        | -0.21      | 0.34      |
| Creatine kinase                      | 0.06        | -0.02      | 0.14      |
| Haemoglobin                          | 0.05        | -0.02      | 0.12      |
| Body temperature                     | 0.05        | -0.02      | 0.12      |
| Platelet                             | 0.03        | -0.04      | 0.11      |
| Systolic pressure                    | -0.03       | -0.1       | 0.04      |
| Age                                  | 0.02        | -0.05      | 0.09      |
| Diastolic pressure                   | -0.01       | -0.08      | 0.06      |

**Supp Table 7: Correlation of clinical and biological variables with a radiologist quantification of disease extent.** Correlation was computed using 817 patients from the KB hospital. Variables are sorted in decreasing order when considering the squared correlation value for ranking.
